# Supplementary material for: One-pot preparation of novel asymmetric structure nanoparticles and its application in catalysis
Source: Royal Society of Chemistry journal article supplement (doi:10.1039/c4ra05950f), 2014-08-20
Supplement: c4ra05950f1.pdf [file c4ra05950f1.pdf]

## Supplementary Information

### One-pot preparation of novel asymmetric structure nanoparticles and its application

Ying-Shuai Wang<sup>a</sup>, Wen-Fei Dong<sup>a</sup>, Hong Xia<sup>a</sup>, Jing Feng<sup>a</sup>, Qi-Sheng Huo<sup>d</sup>, Zaicheng Sun<sup>\*b</sup> and Hong-Bo Sun<sup>\*a, c</sup>

<sup>a</sup> State Key Laboratory on Integrated Optoelectronics, College of Electronic Science and Engineering, Jilin University, 2699 Qianjin Street, Changchun 130012, P.R.China. E-mail: [hbsun@jlu.edu.cn](mailto:hbsun@jlu.edu.cn) (H.-B.S.).

<sup>b</sup> State Key Laboratory of Luminescence and Applications, Changchun Institute of Optics, Fine Mechanics and Physics, Chinese Academy of Sciences (CAS), Changchun, China. E-mail: [sunzc@ciomp.ac.cn](mailto:sunzc@ciomp.ac.cn) (Z.S.).

<sup>c</sup> College of Physics, Jilin University, 119 Jiefang Road, Changchun 130023, P.R.China. E-mail: [hbsun@jlu.edu.cn](mailto:hbsun@jlu.edu.cn) (H.-B.S.).

<sup>d</sup> State Key Laboratory of Inorganic Synthesis and Preparative Chemistry, College of Chemistry, Jilin University, Changchun 130012, P.R.China.

## Experimental section

### Materials

Cetyl trimethyl ammonium bromide (CTAB), Tetraethyl orthosilicate (TEOS) and 4-Nitrophenol (4-NP) were purchased from Sigma-Aldrich. Ammonia, Gold chloride acid ( $\text{HAuCl}_4 \cdot 4\text{H}_2\text{O}$ ) were purchased from Beijing Tianyu Technology Co., Ltd. Auspicious.  $\text{HAuCl}_4$  solution was kept in the refrigerator for the next step.

### The synthesis of gold nanoparticles- mesoporous silica Janus nanoparticles

50 mg of CTAB is dispersed into 10 ml water and ultrasonic uniformly dispersed for at least 40 min until clarification. The solution was poured into a three-necked flask, followed by adding different amounts of  $\text{HAuCl}_4$  (0.01M) solution, then 0.5 ml of ammonia water was quickly added when the temperature was maintained at 40 °C under stirring, and then a certain amount of TEOS was added dropwise into the reaction in a certain speed. The mixture was allowed to react for 30 min. The GNRs- $\text{mSiO}_2$  Janus NPs nanoparticles were obtained after quickly washed for 5 times with ethanol (5000 rpm). The resulting solid was washed with methanol and then drying, the solid was finally calcined at 500 °C for 1 h.

### Characterization

Transmission electron microscopy (TEM) measurements were performed with Hitachi H-8100 microscopes. The morphology of the colloidosomes was characterized using SEM images were obtained with a SKOEL Jeol-7500F.  $\text{N}_2$  adsorption-desorption isotherms were obtained at 77 K on a Micromeritics Tristar 2420 analyzer, the specific surface area was determined by the Brunauer-Emmett-Teller (BET) method and the pore size distributions were calculated by the Barrett-Joyner-Halenda (BJH) method. Powder X-ray diffraction (XRD) data were collected on a Rigaku. UV-vis absorption was recorded using SHIMADZU UV-1700. TEM images were observed with a Hitachi H-8100 microscope with an accelerating voltage of 200 kV. HR-TEM images were taken using a JEOL JEM-2100F.

### Experimental results Figures

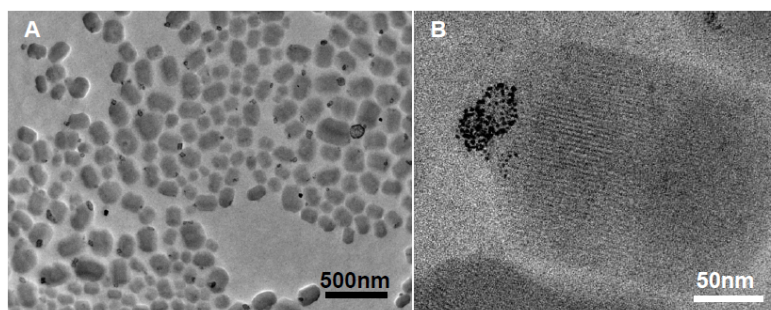

**Fig. S1** (A) TEM images of a wide range of Janus Au- $\text{mSiO}_2$  nanoparticles precursor. (B) High resolution TEM images of Janus Au- $\text{mSiO}_2$  nanoparticles precursor.

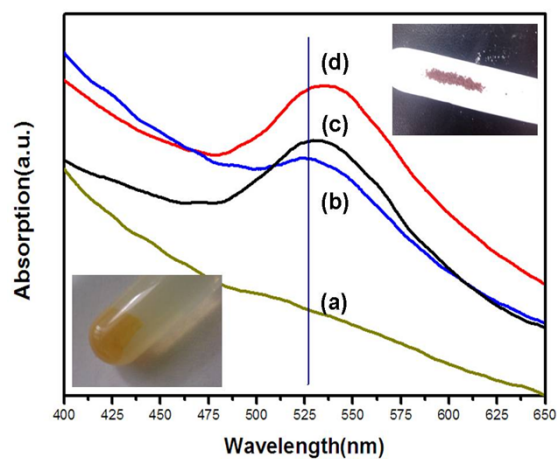

**Fig. S2.** UV-Vis spectra of Au-mSiO<sub>2</sub> (a) (lower left corner, yellow) and after calcinations (upper right corner, ruby), (b) Au/0.5ml, (c) Au/1ml, (d) Au/1.5ml.

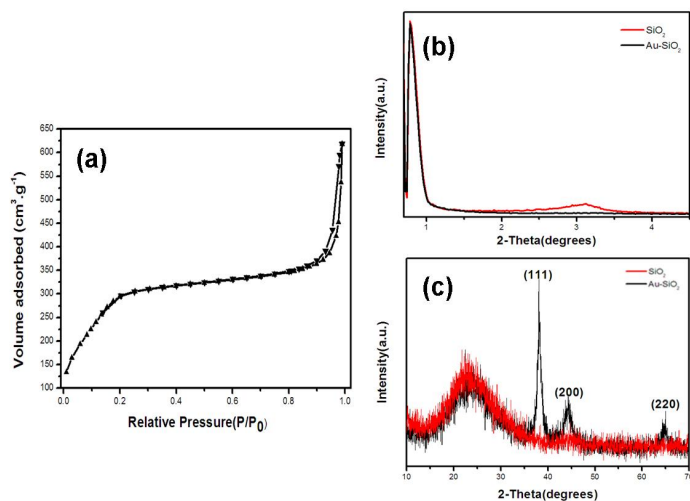

**Fig. S3.** (a) N<sub>2</sub> adsorption isotherm of mesoporous SiO<sub>2</sub> (b) Small-angle XRD patterns of mesoporous SiO<sub>2</sub> and Janus Au-mSiO<sub>2</sub> (c) The wide-angle XRD patterns of mesoporous SiO<sub>2</sub> and Janus Au-mSiO<sub>2</sub>.
